# Supplementary material for: Interplay of opposing fate choices stalls oncogenic growth in murine skin epithelium
Source: eLife journal article supplement (doi:10.7554/elife.54618), 2021-01-04
Supplement: supp [file elife-54618-supp-v1.zip]

Archive with 6 entries (6 files):
- elife_poa_e54618_Figure_1_figure_supplement_1.ai
- elife_poa_e54618_Figure_3_figure_supplement_1.ai
- elife_poa_e54618_Figure_5_figure_supplement_1.ai
- elife_poa_e54618_Supplementary_file_1.xlsx
- elife_poa_e54618_Source_data_1.xlsx
- elife_poa_e54618_Transparent_Reporting_File.pdf
