# Supplementary material for: Interplay of opposing fate choices stalls oncogenic growth in murine skin epithelium
Source: eLife journal article supplement (doi:10.7554/elife.54618), 2021-01-04
Supplement: supp [file elife-54618-supp-v1.zip › elife_poa_e54618_Source_data_1.xlsx]

## Sheet: Hras
Clone id	baseMean	log2FoldChange	lfcSE	stat	pvalue	padj
Araf_AAD70_F10	172.421	-0.93118	0.579719	-1.60626	0.108217	0.201357
Araf_AAD70_F6	366.679	-0.706823	0.525366	-1.34539	0.178499	0.299658
Araf_AAD70_F7	657.972	-1.23308	0.205759	-5.99283	2.06e-09	2.07e-07
Araf_AAD70_F8	919.355	1.03379	0.425992	2.42679	0.0152332	0.0446592
Araf_AAD70_F9	1047.79	-0.491292	0.277685	-1.76924	0.0768531	0.153962
Araf_AAH31_C10	901.249	-0.302487	0.243006	-1.24477	0.213216	0.337217
Araf_AAH31_C11	6780.01	-1.32936	0.427584	-3.109	0.00187725	0.00932418
Araf_AAH31_C7	789.744	1.50775	0.4271	3.53021	0.000415234	0.00324098
Araf_AAH31_C8	53.5149	1.39247	0.724076	1.9231	0.0544671	0.118604
Araf_AAH31_C9	578.517	-3.69165	0.573849	-6.43314	1.25e-10	2.5e-08
Braf_AAD70_D10	1008.51	0.03981	0.254487	0.156432	0.875692	0.915289
Braf_AAD70_D11	1085.61	-1.84069	0.346681	-5.30945	1.1e-07	5.08e-06
Braf_AAD70_D12	1541.51	-0.727819	0.323717	-2.24832	0.0245556	0.0644452
Braf_AAD70_E1	2144.66	-0.557161	0.209619	-2.65798	0.00786114	0.0269974
Braf_AAD70_E2	372.955	0.465052	0.626875	0.741857	0.458174	0.576517
Braf_AAH25_A1	3909.53	-0.430929	0.341273	-1.26271	0.206694	0.329504
Braf_AAH25_A2	519.49	0.108175	0.531777	0.203422	0.838805	0.885979
Braf_AAH25_A3	484.855	-0.103556	0.417837	-0.247838	0.80426	0.866237
Braf_AAH25_A4	3588.33	-0.852717	0.321914	-2.64889	0.00807558	0.0275763
Braf_AAH25_A5	1062.25	-0.761717	0.177719	-4.28608	1.82e-05	0.000339784
Impa1_AAK27_E3	2796.53	-0.563328	0.414799	-1.35808	0.17444	0.294568
Impa1_AAK27_E4	225.307	-0.196393	0.445176	-0.441158	0.659098	0.757059
Impa1_AAK27_E5	1139.2	0.985693	0.299435	3.29184	0.000995334	0.00598195
Impa1_AAK27_E6	2889.6	-0.142343	0.160282	-0.888077	0.374499	0.497952
Impa1_AAK27_E7	880.899	-0.758569	0.219664	-3.45331	0.000553753	0.00400971
Mllt4_AAL29_C12	449.657	1.51023	0.491122	3.07507	0.00210455	0.0101187
Mllt4_AAL29_D1	856.834	0.28141	0.265207	1.06109	0.288648	0.419027
Mllt4_AAL29_D2	2188.52	0.0714812	0.192716	0.370914	0.710702	0.795444
Mllt4_AAL29_D3	503.953	0.533152	0.365547	1.45851	0.144701	0.254284
Mllt4_AAL29_D4	1301.08	-0.0163349	0.314329	-0.0519677	0.958554	0.974774
Pik3ca_AAE05_A11	1032.27	0.466193	0.458635	1.01648	0.309401	0.434463
Pik3ca_AAE05_A12	276.616	1.6056	0.472648	3.39703	0.00068121	0.00454897
Pik3ca_AAE05_B1	1699.28	2.4658	0.58909	4.18578	2.84e-05	0.000474439
Pik3ca_AAE05_B2	5620.66	3.01892	0.550677	5.48219	4.2e-08	2.52e-06
Pik3ca_AAE05_B3	1140.74	-0.121957	0.526106	-0.231811	0.816684	0.87134
Raf1_AAC61_H2	153.604	-0.578588	0.64734	-0.893793	0.371433	0.496069
Raf1_AAC61_H3	1179.23	0.381249	0.19925	1.91342	0.0556945	0.118696
Raf1_AAC61_H4	496.158	0.59689	0.411966	1.44888	0.147371	0.257441
Raf1_AAC61_H5	2026.69	0.366042	0.302344	1.21068	0.226017	0.351907
Raf1_AAC61_H6	3368.26	-0.527564	0.202958	-2.59938	0.00933936	0.0308404
Raf1_AAH33_G4	1961.61	0.660611	0.229321	2.88073	0.0039676	0.0163022
Raf1_AAH33_G5	1114.7	-0.0133683	0.273502	-0.0488784	0.961016	0.975626
Raf1_AAH33_G6	850.599	0.333752	0.324591	1.02822	0.303845	0.431439
Raf1_AAH33_G7	16.2119	0.499361	0.780763	0.639581	0.522445	0.636896
Raf1_AAH33_G8	754.134	0.137413	0.203286	0.67596	0.499066	0.615891
Ralgds_AAH33_A11	1079.28	1.40591	0.478244	2.93974	0.00328493	0.0141017
Ralgds_AAH33_A12	266.855	0.547823	0.389451	1.40665	0.15953	0.275094
Ralgds_AAH33_B1	2105.16	-0.408805	0.305599	-1.33772	0.180988	0.302992
Ralgds_AAH33_B2	1368.55	-0.229348	0.246099	-0.931932	0.351372	0.474549
Ralgds_AAH33_B3	69.5414	-0.777655	0.701527	-1.10852	0.267639	0.399134
Rasip1_AAS35_A4	0.619044	0	0.477114	0	1	NA
Rasip1_AAS35_G5	336.241	1.47249	0.514291	2.86315	0.00419455	0.0170333
Rasip1_AAS35_G7	393.734	1.47765	0.440946	3.35108	0.000804979	0.00514673
Rasip1_AAS35_G8	913.652	-0.0432908	0.209968	-0.206178	0.836652	0.885979
Rassf2_AAJ84_F10	41.6164	-0.333658	0.679185	-0.491263	0.62324	0.728858
Rassf2_AAJ84_F6	8671.62	-0.9884	0.367412	-2.69017	0.00714163	0.0249542
Rassf2_AAJ84_F8	7307.89	-0.61428	0.387704	-1.58441	0.113102	0.208509
Rassf2_AAJ84_F9	198.394	0.0342154	0.447908	0.0763893	0.939109	0.963148
Rassf3_AAJ83_H2	3871.71	-0.865743	0.363184	-2.38376	0.0171368	0.0485812
Rassf3_AAJ83_H3	1210.59	0.941876	0.394228	2.38916	0.0168868	0.0483285
Rassf3_AAJ83_H5	630.278	0.737236	0.398418	1.85041	0.0642549	0.132251
Rassf3_AAJ83_H6	1134.08	0.47185	0.33021	1.42894	0.153022	0.265032
Rassf3_AAU88_E12	2867.96	-0.573705	0.324006	-1.77066	0.0766166	0.153962
Rassf4_AAJ84_E10	969.947	0.347808	0.300436	1.15768	0.246996	0.377004
Rassf4_AAJ84_E11	473.781	0.308664	0.386491	0.798633	0.424503	0.544041
Rassf4_AAJ84_E8	4030.09	-1.11286	0.375496	-2.96371	0.00303954	0.0134112
Rassf4_AAJ84_E9	10252	-1.00074	0.367831	-2.72066	0.00651521	0.0231695
Rassf4_AAU88_F2	171.324	0.379277	0.470922	0.805391	0.420594	0.542472
Rassf5_AAJ85_D10	145.888	0.726107	0.54623	1.32931	0.183747	0.303574
Rassf5_AAJ85_D11	11718.9	-0.370694	0.282855	-1.31054	0.190012	0.311858
Rassf5_AAJ85_D12	10.8702	1.56495	0.794288	1.97026	0.048809	0.109456
Rassf5_AAJ85_E1	146.904	3.06196	0.665785	4.59902	4.24e-06	9.81e-05
Rassf5_AAJ85_E2	20.1285	2.12159	0.781094	2.71618	0.00660394	0.0233469
Rassf6_AAJ83_D5	1923.16	-1.15544	0.304739	-3.79157	0.000149698	0.00155118
Rassf6_AAJ83_D6	1631.57	-0.441654	0.224428	-1.96791	0.0490784	0.109651
Rassf6_AAJ83_D7	12.2633	0.593839	0.729052	0.814536	NA	NA
Rassf6_AAJ83_D8	4207.86	-0.311161	0.298076	-1.0439	0.296532	0.428667
Rassf6_AAJ83_D9	331.835	0.829692	0.385518	2.15215	0.0313856	0.0769908
Rgl1_AAN50_A11	57.3437	-0.285631	0.648246	-0.440622	0.659487	0.757059
Rgl1_AAN50_A12	1018.64	-0.786235	0.195909	-4.01327	5.99e-05	0.000830432
Rgl1_AAN50_B2	841.42	-0.777553	0.373465	-2.08199	0.037343	0.0887081
Rgl1_AAN50_B3	2737.46	-0.275199	0.269167	-1.02241	0.306588	0.432533
Rgl2_AAN49_F10	246.173	-0.109922	0.510748	-0.215217	0.829598	0.880899
Rgl2_AAN49_F6	7332.1	-0.932711	0.333414	-2.79746	0.00515063	0.0197168
Rgl2_AAN49_F7	5132.95	-0.620871	0.24029	-2.58384	0.00977074	0.0319142
Rgl2_AAN49_F8	296.506	1.03427	0.413666	2.50027	0.01241	0.0379571
Rgl2_AAN49_F9	3805.01	-0.948393	0.303118	-3.12879	0.00175527	0.00901637
Rgl3_AAN49_B4	8452.79	-1.49098	0.387416	-3.84852	0.000118832	0.00145751
Rgl3_AAN49_B5	2.33311	0.0621996	0.611733	0.101678	NA	NA
Rgl3_AAN49_B6	323.113	1.40986	0.394332	3.57531	0.000349807	0.00296105
Rgl3_AAN49_B7	2795.12	0.172331	0.334774	0.514769	0.606714	0.716376
Rgs12_AAF34_G10	1619.37	0.266594	0.216902	1.2291	0.219035	0.343707
Rgs12_AAF34_G12	4.88249	-0.631958	0.79293	-0.796991	0.425456	0.544041
Rgs12_AAF34_G9	5892.22	0.470822	0.283818	1.65889	0.0971385	0.184855
Rgs12_AAF34_H1	5940.94	0.03675	0.247931	0.148227	0.882164	0.917558
Rgs12_AAU86_C10	570.117	1.98623	0.483081	4.11158	3.93e-05	0.000621508
Rgs14_AAF34_C12	7175.31	-0.629774	0.393623	-1.59994	0.109612	0.203323
Rgs14_AAF34_D1	2828.55	-0.837933	0.181298	-4.62185	3.8e-06	9.14e-05
Rgs14_AAF34_D2	1165.65	-0.64243	0.202593	-3.17103	0.00151898	0.00821394
Rgs14_AAF34_D3	0.793909	0.173392	0.48973	0.354056	0.723297	NA
Rgs14_AAF34_D4	312.712	0.646253	0.375014	1.72328	0.0848387	0.167724
Rin1_AAJ84_H2	2867.35	-0.448023	0.294641	-1.52057	0.128367	0.230984
Rin1_AAJ84_H4	14.1007	0.550941	0.690387	0.798018	0.42486	0.544041
Rin1_AAJ84_H5	9562.95	-0.666389	0.303052	-2.19892	0.0278833	0.07131
Rin1_AAJ84_H6	1904.9	0.12934	0.238657	0.541949	0.587854	0.695473
Rin2_AAJ83_E3	2171.77	0.0125948	0.419527	0.0300213	0.97605	0.984238
Rin2_AAJ83_E4	351.876	0.305183	0.347436	0.878385	0.379735	0.502689
Rin2_AAJ83_E5	4661.15	0.376641	0.394452	0.954846	0.339656	0.463939
Rin2_AAJ83_E6	212.094	-0.262227	0.533911	-0.491143	0.623326	0.728858
Rin2_AAJ83_E7	3823.29	-0.984986	0.383946	-2.56543	0.0103048	0.032877
Rin3_AAJ84_F12	789.127	-0.347517	0.314478	-1.10506	0.269133	0.39938
Rin3_AAJ84_G1	2022.24	0.240024	0.143729	1.66998	0.0949236	0.182265
Tiam1_AAF92_E10	1184.56	-0.118227	0.21217	-0.557226	0.577373	0.688495
Tiam1_AAF92_E11	583.027	1.23242	0.416435	2.95945	0.00308187	0.0134218
Tiam1_AAF92_E12	670.978	1.29297	0.397258	3.25473	0.00113502	0.00655909
Tiam1_AAF92_E8	1954.91	-0.424325	0.320639	-1.32338	0.185711	0.305786
Tiam1_AAU84_B3	704.148	0.577874	0.266382	2.16935	0.0300564	0.0747024
Tiam2_AAN48_C2	806.013	-1.12398	0.338578	-3.31971	0.000901113	0.0055395
Tiam2_AAN48_C3	95.1649	0.125719	0.545396	0.230509	0.817696	0.87134
Tiam2_AAN48_C4	1274.24	-0.153512	0.25561	-0.60057	0.548126	0.661114
Tiam2_AAN48_C5	57.9506	1.53452	0.649248	2.36353	0.0181016	0.0503661
Tiam2_AAN48_C6	2715.72	-0.0767474	0.341196	-0.224936	0.822029	0.874406

## Sheet: WT
id	baseMean	log2FoldChange	lfcSE	stat	pvalue	padj
Araf_AAD70_F10	172.421	-1.19661	0.576708	-2.07491	0.0379953	0.383552
Araf_AAD70_F6	366.679	-0.561675	0.525017	-1.06982	0.2847	0.756983
Araf_AAD70_F7	657.972	-0.125197	0.203175	-0.616204	0.53776	0.900542
Araf_AAD70_F8	919.355	-0.261814	0.425656	-0.615083	0.5385	0.900542
Araf_AAD70_F9	1047.79	-0.542592	0.275781	-1.96747	0.0491285	0.419997
Araf_AAH31_C10	901.249	-0.549372	0.242171	-2.26853	0.0232972	0.315622
Araf_AAH31_C11	6780.01	-0.0934268	0.427532	-0.218526	0.827019	0.944882
Araf_AAH31_C7	789.744	0.00484232	0.425344	0.0113845	0.990917	0.992661
Araf_AAH31_C8	53.5149	-0.0221935	0.722578	-0.0307144	0.975497	0.989408
Araf_AAH31_C9	578.517	-0.366451	0.5882	-0.623004	0.533282	0.900542
Braf_AAD70_D10	1008.51	-0.718345	0.253353	-2.83536	0.00457745	0.15321
Braf_AAD70_D11	1085.61	-0.0370773	0.346059	-0.107141	0.914677	0.980134
Braf_AAD70_D12	1541.51	0.636054	0.322726	1.97088	0.0487374	0.419997
Braf_AAD70_E1	2144.66	-0.397492	0.208764	-1.90403	0.0569066	0.420518
Braf_AAD70_E2	372.955	-0.366151	0.623569	-0.587186	0.557079	0.900542
Braf_AAH25_A1	3909.53	0.297884	0.341186	0.873084	0.382617	0.827813
Braf_AAH25_A2	519.49	0.139715	0.531433	0.262902	0.792626	0.944882
Braf_AAH25_A3	484.855	-0.303384	0.417384	-0.72687	0.467306	0.886323
Braf_AAH25_A4	3588.33	0.0931922	0.32181	0.289588	0.772132	0.944882
Braf_AAH25_A5	1062.25	0.0997519	0.174401	0.571968	0.567344	0.900542
Impa1_AAK27_E3	2796.53	-0.121993	0.414679	-0.294187	0.768615	0.944882
Impa1_AAK27_E4	225.307	0.309886	0.441523	0.701858	0.482768	0.891867
Impa1_AAK27_E5	1139.2	0.315924	0.298999	1.05661	0.290691	0.759556
Impa1_AAK27_E6	2889.6	-0.284636	0.159895	-1.78014	0.0750528	0.45401
Impa1_AAK27_E7	880.899	-0.0915157	0.217481	-0.420799	0.673902	0.916103
Mllt4_AAL29_C12	449.657	-0.211332	0.490553	-0.430804	0.666611	0.916103
Mllt4_AAL29_D1	856.834	0.22016	0.264339	0.832868	0.404919	0.847055
Mllt4_AAL29_D2	2188.52	-0.00768701	0.191591	-0.040122	0.967996	0.986998
Mllt4_AAL29_D3	503.953	-0.707196	0.366117	-1.93161	0.0534074	0.420518
Mllt4_AAL29_D4	1301.08	-0.405673	0.313652	-1.29338	0.195878	0.670301
Pik3ca_AAE05_A11	1032.27	-0.342779	0.458281	-0.747966	0.454481	0.885183
Pik3ca_AAE05_A12	276.616	-0.877265	0.477423	-1.8375	0.0661358	0.436967
Pik3ca_AAE05_B1	1699.28	0.146796	0.588792	0.249318	0.803115	0.944882
Pik3ca_AAE05_B2	5620.66	-0.406564	0.550415	-0.73865	0.460119	0.886323
Pik3ca_AAE05_B3	1140.74	0.508205	0.526071	0.966039	0.334025	0.788273
Raf1_AAC61_H2	153.604	-0.514287	0.643557	-0.799132	0.424214	0.862357
Raf1_AAC61_H3	1179.23	0.0497012	0.196984	0.252311	0.800801	0.944882
Raf1_AAC61_H4	496.158	-0.479267	0.410721	-1.16689	0.243254	0.723021
Raf1_AAC61_H5	2026.69	0.316612	0.30151	1.05009	0.293677	0.759556
Raf1_AAC61_H6	3368.26	-0.276343	0.202489	-1.36473	0.172338	0.624589
Raf1_AAH33_G4	1961.61	-0.468385	0.228682	-2.0482	0.0405407	0.388228
Raf1_AAH33_G5	1114.7	-0.0763007	0.272008	-0.280508	0.779087	0.944882
Raf1_AAH33_G6	850.599	0.110666	0.322636	0.343004	0.731595	0.93244
Raf1_AAH33_G7	16.2119	-0.319946	0.776764	-0.411895	0.680416	0.916696
Raf1_AAH33_G8	754.134	-0.527173	0.200873	-2.62442	0.00867977	0.186533
Ralgds_AAH33_A11	1079.28	-0.3481	0.47792	-0.728364	0.466391	0.886323
Ralgds_AAH33_A12	266.855	-1.03328	0.389367	-2.65374	0.00796048	0.18118
Ralgds_AAH33_B1	2105.16	0.800159	0.305667	2.61774	0.00885131	0.186533
Ralgds_AAH33_B2	1368.55	0.602046	0.245075	2.45658	0.0140266	0.229298
Ralgds_AAH33_B3	69.5414	-0.397287	0.703534	-0.564701	0.572277	0.900542
Rasip1_AAS35_A4	0.619044	0.0744839	0.485307	0.153478	0.878022	NA
Rasip1_AAS35_G5	336.241	-0.761538	0.512629	-1.48555	0.137397	0.583426
Rasip1_AAS35_G7	393.734	0.482334	0.439559	1.09731	0.272505	0.744004
Rasip1_AAS35_G8	913.652	-0.632412	0.208493	-3.03325	0.00241935	0.1195
Rassf2_AAJ84_F10	41.6164	0.360832	0.677131	0.532884	0.594114	0.900542
Rassf2_AAJ84_F6	8671.62	0.206333	0.367259	0.561818	0.57424	0.900542
Rassf2_AAJ84_F8	7307.89	0.28284	0.387553	0.729811	0.465506	0.886323
Rassf2_AAJ84_F9	198.394	-0.776805	0.446796	-1.73861	0.0821028	0.481613
Rassf3_AAJ83_H2	3871.71	0.142166	0.363058	0.391579	0.695369	0.920443
Rassf3_AAJ83_H3	1210.59	-0.314356	0.393495	-0.798883	0.424358	0.862357
Rassf3_AAJ83_H5	630.278	0.387608	0.397954	0.974003	0.330055	0.783105
Rassf3_AAJ83_H6	1134.08	-0.125304	0.329489	-0.380297	0.703725	0.920505
Rassf3_AAU88_E12	2867.96	0.11561	0.323808	0.357031	0.721068	0.930358
Rassf4_AAJ84_E10	969.947	0.00573742	0.299147	0.0191793	0.984698	0.991871
Rassf4_AAJ84_E11	473.781	-0.144721	0.384869	-0.376027	0.706897	0.922533
Rassf4_AAJ84_E8	4030.09	0.0147206	0.375428	0.0392102	0.968723	0.986998
Rassf4_AAJ84_E9	10252	0.377406	0.367743	1.02628	0.304761	0.770706
Rassf4_AAU88_F2	171.324	-0.12035	0.46963	-0.256264	0.797747	0.944882
Rassf5_AAJ85_D10	145.888	0.11663	0.542567	0.21496	0.829799	0.944882
Rassf5_AAJ85_D11	11718.9	0.141282	0.282773	0.499629	0.617336	0.900542
Rassf5_AAJ85_D12	10.8702	-0.359181	0.793966	-0.452389	0.650989	NA
Rassf5_AAJ85_E1	146.904	-0.466318	0.663097	-0.703243	0.481905	0.891867
Rassf5_AAJ85_E2	20.1285	-0.507974	0.780061	-0.651199	0.514918	0.900542
Rassf6_AAJ83_D5	1923.16	0.278888	0.304023	0.917326	0.358972	0.810862
Rassf6_AAJ83_D6	1631.57	-0.115417	0.223688	-0.515971	0.605875	0.900542
Rassf6_AAJ83_D7	12.2633	0.271177	0.728747	0.372113	NA	NA
Rassf6_AAJ83_D8	4207.86	0.0106842	0.297858	0.0358699	0.971386	0.986998
Rassf6_AAJ83_D9	331.835	-0.183928	0.385867	-0.476662	0.633603	0.903064
Rgl1_AAN50_A11	57.3437	-0.163149	0.636476	-0.256332	0.797695	0.944882
Rgl1_AAN50_A12	1018.64	-0.263696	0.191765	-1.3751	0.1691	0.620762
Rgl1_AAN50_B2	841.42	0.0573656	0.372618	0.153953	0.877647	0.963635
Rgl1_AAN50_B3	2737.46	-0.252154	0.268393	-0.939496	0.347476	0.797233
Rgl2_AAN49_F10	246.173	-0.215831	0.51044	-0.422834	0.672416	0.916103
Rgl2_AAN49_F6	7332.1	0.148882	0.333345	0.446631	0.655141	0.912014
Rgl2_AAN49_F7	5132.95	0.409661	0.240148	1.70587	0.0880328	0.498693
Rgl2_AAN49_F8	296.506	0.0924263	0.411558	0.224577	0.822309	0.944882
Rgl2_AAN49_F9	3805.01	-0.170929	0.302927	-0.564259	0.572578	0.900542
Rgl3_AAN49_B4	8452.79	-0.341996	0.387442	-0.882702	0.377397	0.827813
Rgl3_AAN49_B5	2.33311	0.0453997	0.617285	0.0735474	NA	NA
Rgl3_AAN49_B6	323.113	0.246082	0.391867	0.627973	0.530022	0.900542
Rgl3_AAN49_B7	2795.12	0.165558	0.334443	0.495027	0.620581	0.900542
Rgs12_AAF34_G10	1619.37	0.174374	0.216334	0.806041	0.420219	0.862357
Rgs12_AAF34_G12	4.88249	-0.0510754	0.792477	-0.0644504	0.948612	NA
Rgs12_AAF34_G9	5892.22	0.344079	0.28363	1.21313	0.225081	0.707577
Rgs12_AAF34_H1	5940.94	0.0866498	0.247634	0.349911	0.726405	0.93244
Rgs12_AAU86_C10	570.117	0.0730575	0.481883	0.151608	0.879496	0.963635
Rgs14_AAF34_C12	7175.31	-0.166839	0.393547	-0.423938	0.671611	0.916103
Rgs14_AAF34_D1	2828.55	-0.282805	0.180776	-1.56439	0.117725	0.552513
Rgs14_AAF34_D2	1165.65	-0.252052	0.201458	-1.25114	0.210884	0.694908
Rgs14_AAF34_D3	0.793909	-0.0031726	0.496968	-0.00638392	0.994906	NA
Rgs14_AAF34_D4	312.712	0.423032	0.371072	1.14003	0.254275	0.734428
Rin1_AAJ84_H2	2867.35	0.122615	0.294046	0.416994	0.676683	0.916696
Rin1_AAJ84_H4	14.1007	0.158953	0.701766	0.226504	0.82081	NA
Rin1_AAJ84_H5	9562.95	0.54356	0.303011	1.79386	0.072835	0.450756
Rin1_AAJ84_H6	1904.9	-0.077973	0.238142	-0.327422	0.743349	0.936072
Rin2_AAJ83_E3	2171.77	1.11449	0.419373	2.65751	0.00787211	0.18118
Rin2_AAJ83_E4	351.876	0.288826	0.345083	0.836977	0.402605	0.846694
Rin2_AAJ83_E5	4661.15	0.548266	0.394301	1.39048	0.164385	0.61712
Rin2_AAJ83_E6	212.094	0.0320775	0.531522	0.0603503	0.951877	0.985946
Rin2_AAJ83_E7	3823.29	-0.213582	0.383618	-0.556757	0.577693	0.900542
Rin3_AAJ84_F12	789.127	-0.656175	0.313152	-2.09539	0.0361363	0.383552
Rin3_AAJ84_G1	2022.24	-0.2331	0.143105	-1.62887	0.103341	0.542273
Tiam1_AAF92_E10	1184.56	0.182387	0.21101	0.864352	0.387395	0.828675
Tiam1_AAF92_E11	583.027	0.0317178	0.415171	0.0763971	0.939103	0.984069
Tiam1_AAF92_E12	670.978	0.261879	0.395778	0.661682	0.508175	0.900542
Tiam1_AAF92_E8	1954.91	0.297374	0.32018	0.928769	0.353009	0.806675
Tiam1_AAU84_B3	704.148	-0.294959	0.264788	-1.11394	0.265303	0.734465
Tiam2_AAN48_C2	806.013	-0.310327	0.336386	-0.922534	0.35625	0.810825
Tiam2_AAN48_C3	95.1649	0.287761	0.545598	0.527423	0.5979	0.900542
Tiam2_AAN48_C4	1274.24	-0.25995	0.254599	-1.02102	0.307247	0.773554
Tiam2_AAN48_C5	57.9506	-1.36178	0.65001	-2.09502	0.0361695	0.383552
Tiam2_AAN48_C6	2715.72	-0.269678	0.341176	-0.790436	0.429273	0.868341
