# Supplementary material for: Interplay of opposing fate choices stalls oncogenic growth in murine skin epithelium
Source: eLife journal article supplement (doi:10.7554/elife.54618), 2021-01-04
Supplement: supp [file elife-54618-supp-v1.zip › elife_poa_e54618_Supplementary_file_1.xlsx]

## Sheet:  Hras
Supplementary File 1: Regulators of HrasG12V progenitor renewal.
Candidates for renewal regulation in oncogenic tissue as identified by DESeq2 analysis of shRNA enrichment in basal progenitors relative to differentiated suprabasal cells.
Positive fold-change value indicates shRNA enrichment in epidermal basal progenitors.
Negative renewal regulators
Rank	Gene Symbol	Enriched shRNAs	Depleted shRNAs	Average fold change
1	Pik3ca	3	0	1.48691
2	Rassf5	2	0	1.42078
3	Rasip1	2	0	0.726712
4	Tiam1	2	0	0.512141
5	Mllt4	1	0	0.475988
6	Rgs12	1	0	0.425687
7	Raf1	1	1	0.18558
8	Rassf3	0	0	0.142303
9	Ralgds	1	0	0.107585
10	Tiam2	0	1	0.0611994
11	Rgl3	1	1	0.0383532
Positive renewal regulators
Rank	Gene Symbol	Enriched shRNAs	Depleted shRNAs	Average fold change
1	Rin3	0	0	-0.0537466
2	Rassf6	0	1	-0.0969448
3	Rin1	0	0	-0.108533
4	Rin2	0	0	-0.110559
5	Impa1	1	1	-0.134988
6	Rassf4	0	2	-0.215571
7	Rgs14	0	2	-0.258098
8	Rgl2	0	3	-0.315525
9	Braf	0	4	-0.466155
10	Araf	1	3	-0.475185
11	Rassf2	0	1	-0.475531
12	Rgl1	0	1	-0.531154

## Sheet: WT
Candidates for renewal regulation in WT tissue as identified by DESeq2 analysis of shRNA enrichment in basal progenitors relative to differentiated suprabasal cells.
Positive fold-change value indicates shRNA enrichment in epidermal basal progenitors.
Negative renewal regulators
Rank	Gene Symbol	Enriched shRNAs	Depleted shRNAs	Average Fold Change
1	Rin2	1	0	0.354014
2	Rin1	0	0	0.186789
3	Rgs12	0	0	0.125417
4	Tiam1	0	0	0.0956797
5	Rgl2	0	0	0.0528418
6	Rassf6	0	0	0.0522808
7	Rassf3	0	0	0.0411448
8	Rgl3	0	0	0.028761
9	Rassf4	0	0	0.0265587
10	Impa1	0	0	0.0255332
11	Rassf2	0	0	0.0183
Positive renewal regulators
Rank	Gene Symbol	Enriched shRNAs	Depleted shRNAs	Average fold change
1	Braf	0	1	-0.0555852
2	Rgs14	0	0	-0.0563674
3	Ralgds	1	1	-0.0752919
4	Rgl1	0	0	-0.155408
5	Pik3ca	0	0	-0.194321
6	Rasip1	0	1	-0.209283
7	Rassf5	0	0	-0.215112
8	Raf1	0	1	-0.218472
9	Mllt4	0	0	-0.222346
10	Araf	0	0	-0.371449
11	Tiam2	0	0	-0.382795
12	Rin3	0	0	-0.444638
